# Supplementary material for: Electron-deficient truxenone derivatives and their use in organic photovoltaics
Source: Royal Society of Chemistry journal article supplement (doi:10.1039/c4ta01653j), 2014-01-01
Supplement: c4ta01653j1.pdf [file c4ta01653j1.pdf]

# Electron-Deficient Truxenone Derivatives and Their Use in Organic Photovoltaics

*Christian B. Nielsen,<sup>a,\*</sup> Eszter Voroshazi,<sup>b</sup> Sarah Holliday,<sup>a</sup> Kjell Cnops,<sup>b,c</sup> David Cheyns<sup>b</sup>  
and Iain McCulloch<sup>a</sup>*

<sup>a</sup> Department of Chemistry and Centre for Plastic Electronics, Imperial College London,  
London SW7 2AZ, U.K. <sup>b</sup> IMEC, Kapeldreef 75, B-3001 Heverlee, Belgium. <sup>c</sup> Katholieke  
Universiteit Leuven, ESAT, Kasteelpark Arenberg 10, Heverlee, Belgium.

\*c.nielsen@imperial.ac.uk

## Supporting Information

|                                  |    |
|----------------------------------|----|
| Experimental details             | S2 |
| NMR spectra                      | S5 |
| AFM micrographs                  | S6 |
| Calculated orbital distributions | S7 |
| J-V curves                       | S8 |
| EQE curves                       | S8 |
| Computational data               | S9 |

## Experimental Section

All chemicals were purchased from commercial suppliers unless otherwise specified. 4,9,14-Tris(5-hexyl-2-thienyl)truxenone (**1**) was synthesised according to a literature procedure (*J. Mater. Chem. A*, 2013, **1**, 73). <sup>1</sup>H NMR spectra were recorded on a BRUKER 400 spectrometer in CDCl<sub>3</sub> solution at 298 K unless otherwise stated. The thermal stability of the polymers was analyzed by thermogravimetric analysis (TGA) using a TA Instruments Q50 under a continuous nitrogen purge of 60 mL/min. The samples were heated from room temperature to 600°C with a uniform heating rate of 10°C/min. Differential scanning calorimetry (DSC) was carried out with a TA Instruments DSC Q20. UV-Vis absorption spectra were recorded on a UV-1800 Shimadzu UV-Vis spectrophotometer. Cyclic voltammetry was performed with a standard three-electrode setup with a Pt-disk working electrode and an Ag/Ag<sup>+</sup> reference electrode calibrated against Fc/Fc<sup>+</sup> using an Autolab PGSTAT101 potentiostat. The measurements were carried out with 3×10<sup>-4</sup> M solutions in anhydrous and deoxygenated dichloromethane with 0.1 M tetrabutylammonium hexafluorophosphate as the supporting electrolyte. HOMO and LUMO energy values were obtained using the following equations:  $E_{\text{LUMO}} = -(E_{\text{red}} - E_{\text{Fc}} + 4.8) \text{ eV}$  and  $E_{\text{HOMO}} = -(E_{\text{ox}} - E_{\text{Fc}} + 4.8) \text{ eV}$ .

**T1A, T2A and T3A.** To a solution of **1** (203 mg, 0.230 mmol) and ethyl cyanoacetate (0.48 ml, 4.5 mmol) in anhydrous chlorobenzene (10 ml) cooled to 0°C was added titanium tetrachloride (0.21 ml, 1.9 mmol) and *N*-methylmorpholine (0.86 ml, 7.8 mmol). The dark reaction mixture was stirred and sonicated for 24 h at ambient temperature. A crude mixture of Knoevenagel adducts were subsequently obtained by filtering through a short pad of silica eluting with chloroform. At this stage, separation of adducts by column chromatography (silica, hexane/dichloromethane) can be performed for optimum yield of **T1A**. Alternatively, the Knoevenagel reaction can be repeated on the mixture using identical conditions as above for optimum yield of **T3A**.

**T1A** was obtained as a red solid. <sup>1</sup>H NMR (400 MHz, CDCl<sub>3</sub>): δ (ppm) 9.41 (d, *J* = 1.8 Hz, 1H), 9.08 (d, *J* = 1.7 Hz, 1H), 8.32 (d, *J* = 8.3 Hz, 1H), 7.68 (d, *J* = 1.6 Hz, 1H), 7.57 (d, *J* = 7.8 Hz, 1H), 7.52 – 7.27 (m, 7H), 6.83 – 6.69 (m, 3H), 3.93 (dd, *J* = 10.7, 7.1 Hz, 1H), 3.71 (dd, *J* = 10.7, 7.1 Hz, 1H), 2.85 (m, 6H), 1.74 (m, 6H), 1.41 (m, 18H), 1.06 – 0.86 (m, 12H).

**T2A** was obtained as a dark red solid.  $^1\text{H}$  NMR (400 MHz,  $\text{CDCl}_3$ ):  $\delta$  (ppm) 9.66 (d,  $J = 1.8$  Hz, 1H), 8.57 (d,  $J = 8.3$  Hz, 1H), 8.52 (d,  $J = 8.4$  Hz, 1H), 7.88 (d,  $J = 1.7$  Hz, 1H), 7.79 (d,  $J = 7.8$  Hz, 1H), 7.71 (d,  $J = 1.4$  Hz, 1H), 7.63 (m, 3H), 7.47 (d,  $J = 3.6$  Hz, 1H), 7.39 (d,  $J = 3.7$  Hz, 1H), 7.35 (d,  $J = 3.6$  Hz, 1H), 6.88 – 6.79 (m, 3H), 4.02 – 3.66 (m, 4H), 2.87 (m, 6H), 1.75 (m, 6H), 1.51 – 1.29 (m, 18H), 1.01 (m, 6H), 0.92 (m, 9H).

**T3A** was obtained as a red solid.  $^1\text{H}$  NMR (400 MHz,  $\text{CDCl}_3$ ):  $\delta$  (ppm) 8.57 (d,  $J = 8.4$  Hz, 3H), 7.84 (d,  $J = 1.7$  Hz, 3H), 7.61 (dd,  $J = 8.4, 1.7$  Hz, 3H), 7.34 (d,  $J = 3.7$  Hz, 3H), 6.85 (d,  $J = 3.7$  Hz, 3H), 3.94 (m, 6H), 2.87 (t,  $J = 7.6$  Hz, 6H), 1.73 (p,  $J = 7.6$  Hz, 6H), 1.46 – 1.27 (m, 18H), 1.05 (t,  $J = 7.1$  Hz, 9H), 0.91 (m, 9H).

We note that for all three truxenone adducts, small amounts (~10%) of isomers are present due to the E-Z isomerism associated with the tetrasubstituted double bonds. This has also been described by Zhang et al. in *Org. Lett.* 2006, 8, 2563-2566.

### Device preparation

The substrates used in this study are glass substrates with 110 nm thick pre-patterned ITO (Kintec). Substrate cleaning consisted of sonication in detergent, deionized water and acetone, followed by submersion in hot isopropanol. Upon cleaning, ZnO is deposited from a Zn(acac) precursor solution in air and annealed at 300°C for 10 min. Truxenone and PCBM (Solenne bv.) layers are deposited from a chloroform solution under  $\text{N}_2$  atmosphere. Materials were dissolved in a concentration of 10 mg/ml. The substrates with the acceptors were transferred in thermal evaporation chamber and left outgassing overnight at  $10^{-7}$  Torr.

The donor materials, ZnPc (Sigma-Aldrich) and SubPc (Lumtec Corp.), were purified once using thermal gradient sublimation, and  $\text{MoO}_3$  and Ag were used as received. Organic thin films were deposited by thermal evaporation in a high vacuum evaporator with a base pressure  $10^{-7}$  Torr and growth rate of 1 Å/s, as monitored by a quartz crystal microbalance, and the substrate temperature was fixed to room temperature. The Ag cathode is evaporated through a shadow mask, defining an active area of 0.134  $\text{cm}^2$ .

### Thin film and device characterization

Current-voltage characteristics of photovoltaic cells were measured in dark and under simulated solar light, using a Keithley 2602 in combination with an Abet solar simulator,

calibrated to produce  $100 \text{ mW cm}^{-2}$  AM1.5G illumination. In the spectral response and reflection setup, light from Xe and quartz halogen lamps were coupled into a monochromator and their intensities calibrated with a Si photodiode. The light incident on the device was chopped and the modulated current signal detected with current-voltage and lock-in amplifiers. Reflection measurements were conducted with an integrating sphere. AFM images were collected using a Picoscan PicoSPM LE scanning probe operated in the tapping mode. Layer thicknesses of solution processed layers were measured with a Dektak profilometer.

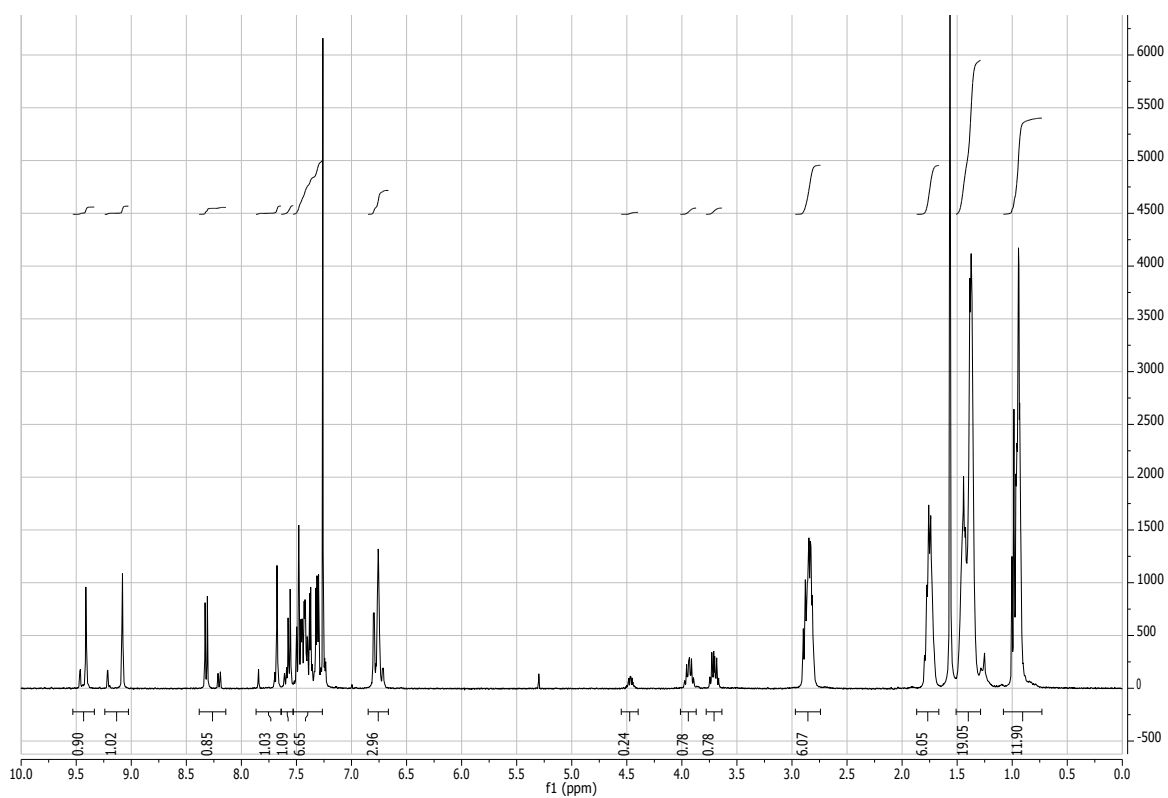

**Figure S1**  $^1\text{H-NMR}$  spectrum of **T1A**.

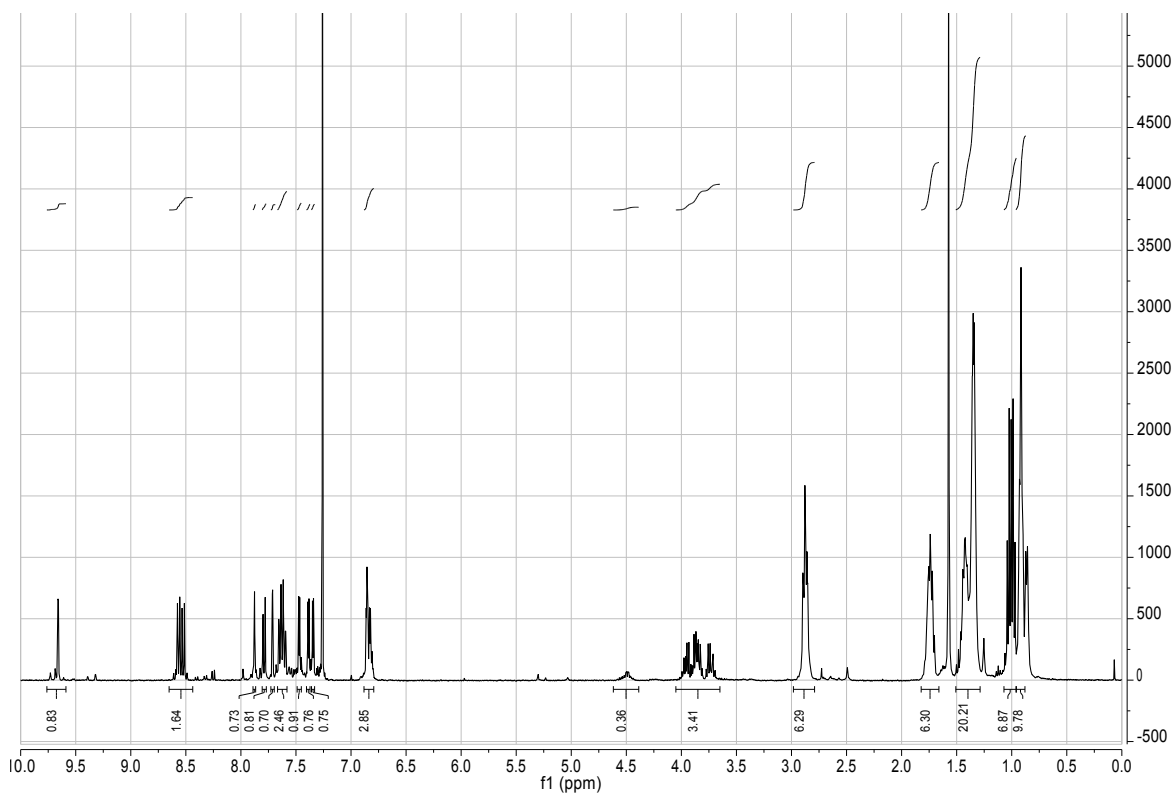

**Figure S2**  $^1\text{H-NMR}$  spectrum of **T2A**.

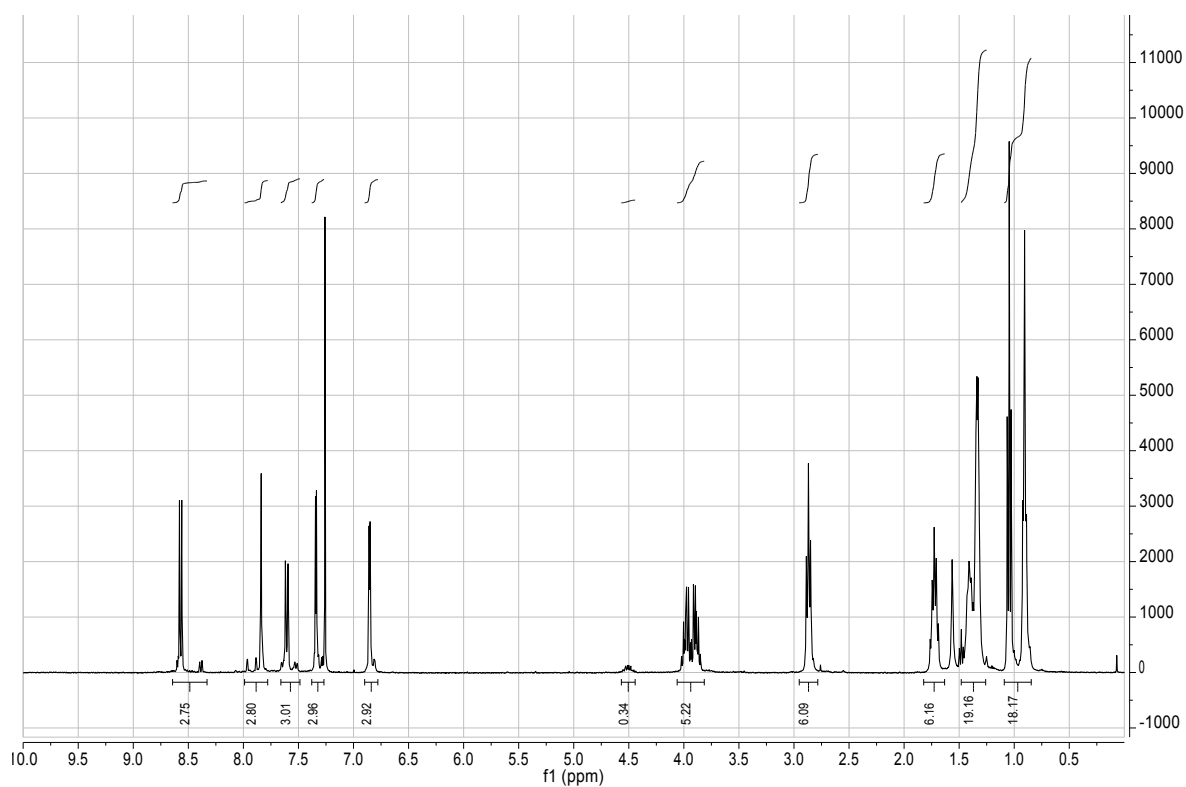

**Figure S3**  $^1\text{H-NMR}$  spectrum of **T3A**.

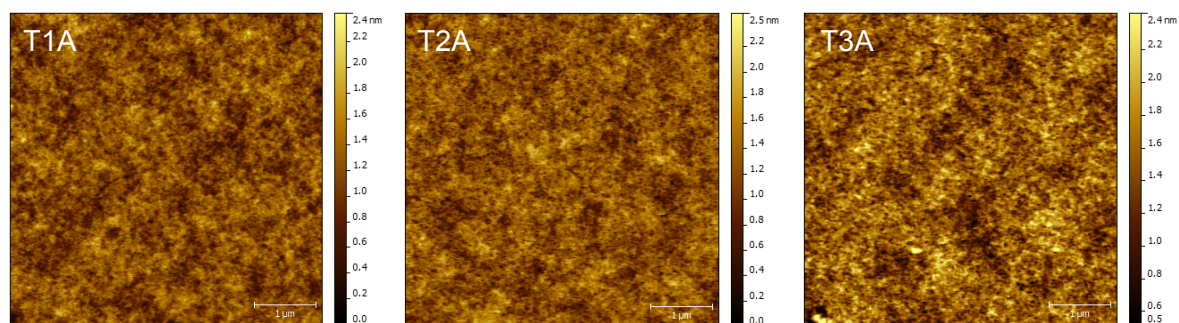

**Figure S4** Topography scans by AFM of the solution processed truxenone layers using **T1A** (left), **T2A** (middle), and **T3A** (right). Roughnesses are in all three cases around 0.27 to 0.29 nm and scale bar is 1  $\mu\text{m}$ .

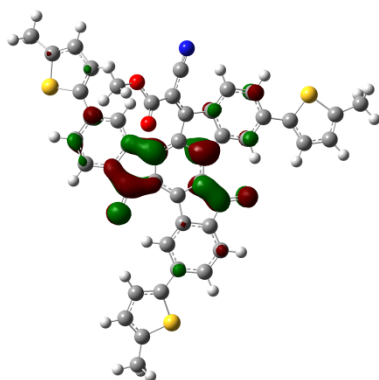

**Figure S5** LUMO+1 orbital distribution for **T1A** calculated with Gaussian at the B3LYP/6-31G\* level.

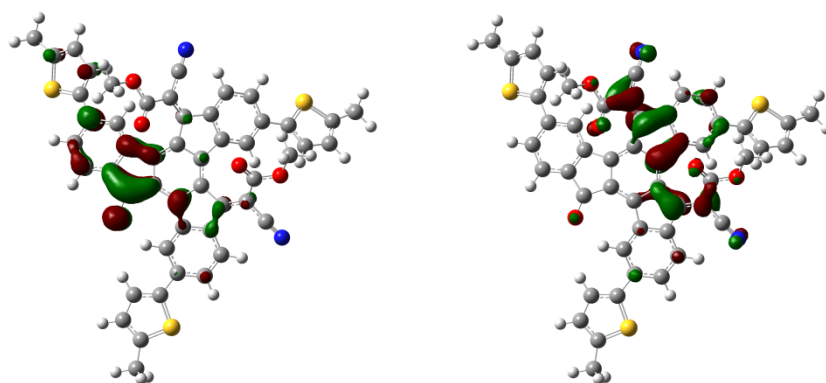

**Figure S6** LUMO+2 (left) and LUMO+1 (right) orbital distributions for **T2A** calculated with Gaussian at the B3LYP/6-31G\* level.

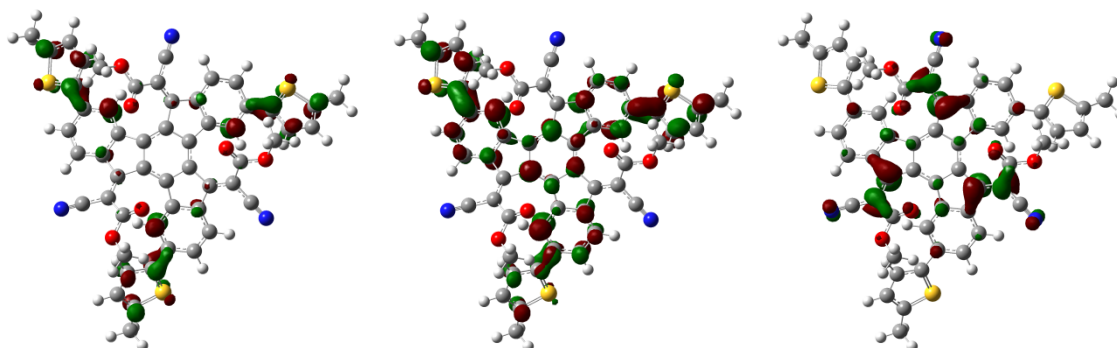

**Figure S7** LUMO+3 (left), LUMO+2 (middle) and LUMO+1 (right) orbital distributions for **T3A** calculated with Gaussian at the B3LYP/6-31G\* level.

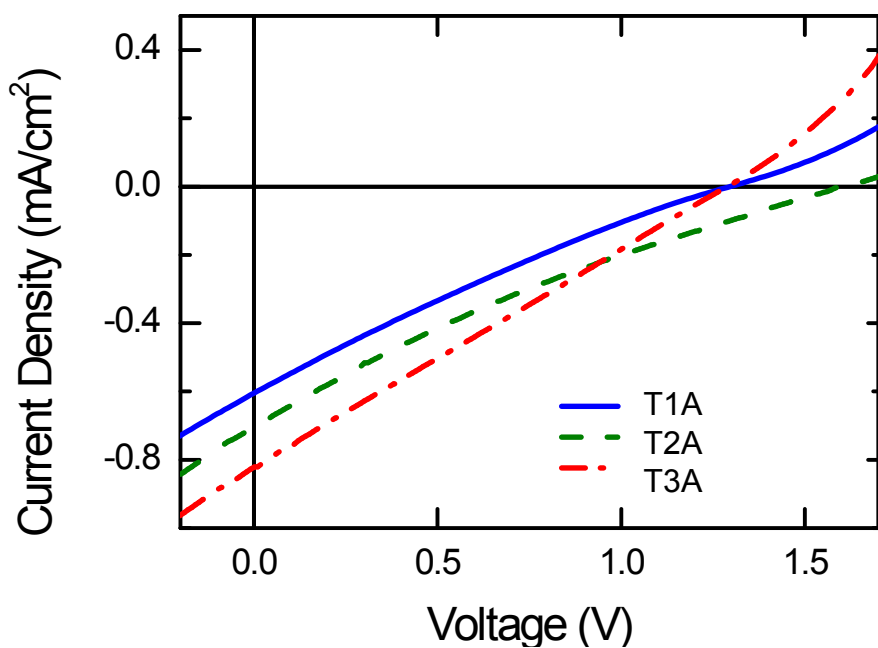

**Figure S8** Current density-voltage ( $J$ - $V$ ) characteristics of the three SubPc devices measured under  $100 \text{ mW/cm}^2$  intensity AM1.5G spectrum solar radiation.

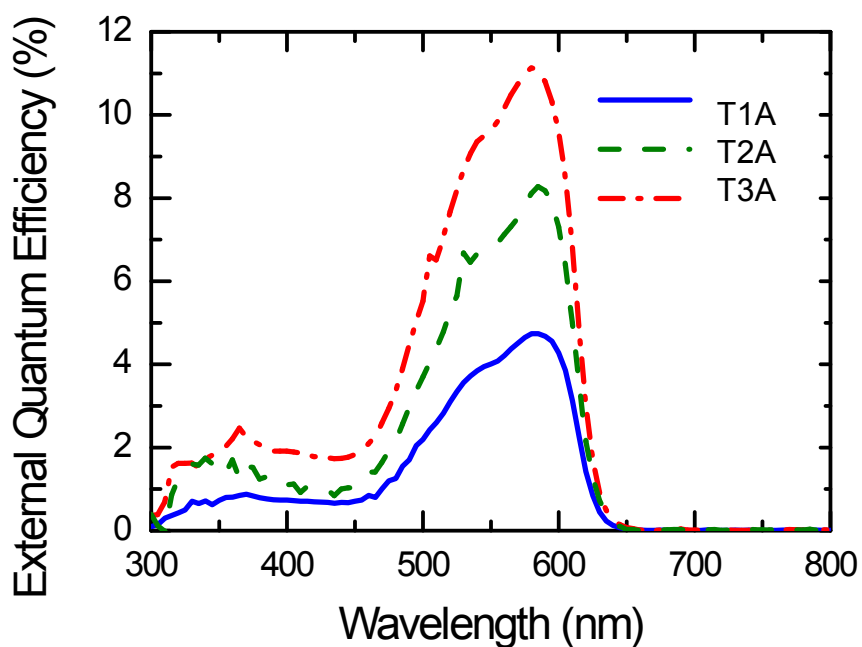

**Figure S9** EQE plots for the three SubPc devices.



Table S1. Calculated Singlet Excitation Energies and Oscillator Strengths for T1A

|                   |           |           |          |              |
|-------------------|-----------|-----------|----------|--------------|
| Excited State 1:  | 2.1736 eV | 570.41 nm | f=0.2318 | <S**2>=0.000 |
| 192 ->196         | 0.13818   |           |          |              |
| 193 ->196         | -0.21055  |           |          |              |
| 194 ->196         | -0.15614  |           |          |              |
| 195 ->196         | 0.63097   |           |          |              |
| Excited State 2:  | 2.2024 eV | 562.96 nm | f=0.0624 | <S**2>=0.000 |
| 193 ->196         | -0.37765  |           |          |              |
| 194 ->196         | 0.58475   |           |          |              |
| Excited State 3:  | 2.2597 eV | 548.67 nm | f=0.1056 | <S**2>=0.000 |
| 193 ->196         | 0.55194   |           |          |              |
| 194 ->196         | 0.34482   |           |          |              |
| 195 ->196         | 0.25983   |           |          |              |
| Excited State 4:  | 2.4866 eV | 498.61 nm | f=0.0463 | <S**2>=0.000 |
| 192 ->196         | -0.10268  |           |          |              |
| 194 ->197         | 0.10402   |           |          |              |
| 195 ->197         | 0.67683   |           |          |              |
| Excited State 5:  | 2.5039 eV | 495.17 nm | f=0.1349 | <S**2>=0.000 |
| 194 ->197         | 0.67585   |           |          |              |
| 195 ->197         | -0.10472  |           |          |              |
| Excited State 6:  | 2.6167 eV | 473.83 nm | f=0.1605 | <S**2>=0.000 |
| 193 ->197         | 0.68111   |           |          |              |
| Excited State 7:  | 2.7276 eV | 454.55 nm | f=0.0248 | <S**2>=0.000 |
| 191 ->196         | -0.26434  |           |          |              |
| 192 ->196         | 0.45460   |           |          |              |
| 194 ->198         | -0.23177  |           |          |              |
| 195 ->196         | -0.12221  |           |          |              |
| 195 ->198         | -0.34109  |           |          |              |
| Excited State 8:  | 2.7702 eV | 447.56 nm | f=0.1928 | <S**2>=0.000 |
| 191 ->196         | -0.44098  |           |          |              |
| 194 ->198         | 0.51674   |           |          |              |
| Excited State 9:  | 2.8011 eV | 442.63 nm | f=0.2701 | <S**2>=0.000 |
| 191 ->196         | 0.40345   |           |          |              |
| 192 ->196         | 0.32663   |           |          |              |
| 192 ->197         | -0.22461  |           |          |              |
| 194 ->198         | 0.37665   |           |          |              |
| Excited State 10: | 2.8396 eV | 436.62 nm | f=0.2706 | <S**2>=0.000 |
| 192 ->196         | 0.34207   |           |          |              |
| 192 ->197         | 0.11392   |           |          |              |
| 194 ->197         | 0.10121   |           |          |              |
| 195 ->198         | 0.58329   |           |          |              |
| Excited State 11: | 2.9233 eV | 424.12 nm | f=0.1243 | <S**2>=0.000 |
| 191 ->196         | -0.11180  |           |          |              |
| 191 ->197         | -0.14536  |           |          |              |

|                                                             |          |  |  |  |  |
|-------------------------------------------------------------|----------|--|--|--|--|
| 192 ->197                                                   | -0.21551 |  |  |  |  |
| 193 ->198                                                   | 0.61260  |  |  |  |  |
| Excited State 12: 3.0511 eV 406.36 nm f=0.4377 <S**2>=0.000 |          |  |  |  |  |
| 191 ->196                                                   | 0.15381  |  |  |  |  |
| 191 ->198                                                   | -0.14978 |  |  |  |  |
| 192 ->197                                                   | 0.56065  |  |  |  |  |
| 193 ->198                                                   | 0.25202  |  |  |  |  |
| Excited State 13: 3.1040 eV 399.43 nm f=0.0167 <S**2>=0.000 |          |  |  |  |  |
| 185 ->196                                                   | -0.10857 |  |  |  |  |
| 185 ->197                                                   | -0.11031 |  |  |  |  |
| 185 ->198                                                   | -0.26122 |  |  |  |  |
| 187 ->196                                                   | 0.27504  |  |  |  |  |
| 187 ->197                                                   | 0.45264  |  |  |  |  |
| 187 ->198                                                   | 0.22305  |  |  |  |  |
| 188 ->197                                                   | 0.11426  |  |  |  |  |
| 191 ->197                                                   | 0.12215  |  |  |  |  |
| Excited State 14: 3.1610 eV 392.23 nm f=0.0152 <S**2>=0.000 |          |  |  |  |  |
| 185 ->197                                                   | 0.39242  |  |  |  |  |
| 185 ->198                                                   | -0.19300 |  |  |  |  |
| 187 ->196                                                   | -0.24514 |  |  |  |  |
| 187 ->197                                                   | 0.26574  |  |  |  |  |
| 187 ->198                                                   | -0.31575 |  |  |  |  |
| 188 ->197                                                   | 0.10391  |  |  |  |  |
| Excited State 15: 3.2208 eV 384.95 nm f=0.4026 <S**2>=0.000 |          |  |  |  |  |
| 191 ->197                                                   | -0.36764 |  |  |  |  |
| 192 ->198                                                   | 0.53180  |  |  |  |  |
| Excited State 16: 3.3017 eV 375.52 nm f=0.0126 <S**2>=0.000 |          |  |  |  |  |
| 185 ->196                                                   | 0.10810  |  |  |  |  |
| 185 ->197                                                   | 0.28903  |  |  |  |  |
| 187 ->196                                                   | 0.45469  |  |  |  |  |
| 187 ->197                                                   | -0.13917 |  |  |  |  |
| 187 ->198                                                   | -0.16967 |  |  |  |  |
| 188 ->196                                                   | 0.27324  |  |  |  |  |
| 189 ->196                                                   | 0.19464  |  |  |  |  |
| Excited State 17: 3.3320 eV 372.11 nm f=0.0143 <S**2>=0.000 |          |  |  |  |  |
| 186 ->196                                                   | 0.22062  |  |  |  |  |
| 187 ->196                                                   | -0.18383 |  |  |  |  |
| 189 ->196                                                   | 0.33417  |  |  |  |  |
| 190 ->196                                                   | 0.46353  |  |  |  |  |
| 191 ->197                                                   | 0.22430  |  |  |  |  |
| Excited State 18: 3.3575 eV 369.28 nm f=0.0819 <S**2>=0.000 |          |  |  |  |  |
| 188 ->196                                                   | 0.19897  |  |  |  |  |
| 189 ->196                                                   | -0.20561 |  |  |  |  |
| 190 ->196                                                   | -0.18298 |  |  |  |  |
| 191 ->197                                                   | 0.42483  |  |  |  |  |
| 192 ->198                                                   | 0.36691  |  |  |  |  |
| 193 ->198                                                   | 0.13067  |  |  |  |  |
| Excited State 19: 3.3833 eV 366.46 nm f=0.0303 <S**2>=0.000 |          |  |  |  |  |

|           |          |
|-----------|----------|
| 187 ->196 | -0.25390 |
| 188 ->196 | 0.59706  |
| 191 ->197 | -0.16115 |
| 192 ->198 | -0.14853 |

Excited State 20: 3.4140 eV 363.16 nm f=0.0363 <S\*\*2>=0.000

|           |          |
|-----------|----------|
| 186 ->196 | -0.31294 |
| 187 ->196 | -0.16695 |
| 189 ->196 | 0.51689  |
| 190 ->196 | -0.28499 |

**Table S2. Calculated Singlet Excitation Energies and Oscillator Strengths for T2A**

Excited State 1: 2.1165 eV 585.81 nm f=0.1713 <S\*\*2>=0.000

|           |          |
|-----------|----------|
| 213 ->217 | 0.15474  |
| 215 ->217 | 0.10564  |
| 215 ->218 | -0.10871 |
| 216 ->217 | 0.66419  |

Excited State 2: 2.1662 eV 572.35 nm f=0.0262 <S\*\*2>=0.000

|           |          |
|-----------|----------|
| 214 ->218 | -0.19481 |
| 215 ->217 | 0.64559  |

Excited State 3: 2.2196 eV 558.59 nm f=0.0255 <S\*\*2>=0.000

|           |          |
|-----------|----------|
| 214 ->217 | 0.47475  |
| 215 ->218 | -0.44366 |
| 216 ->218 | 0.25074  |

Excited State 4: 2.2424 eV 552.91 nm f=0.2253 <S\*\*2>=0.000

|           |          |
|-----------|----------|
| 214 ->217 | -0.39596 |
| 214 ->218 | -0.14416 |
| 216 ->218 | 0.53367  |

Excited State 5: 2.2938 eV 540.52 nm f=0.1673 <S\*\*2>=0.000

|           |          |
|-----------|----------|
| 212 ->218 | -0.11267 |
| 214 ->217 | 0.25692  |
| 214 ->218 | 0.27177  |
| 215 ->218 | 0.42984  |
| 216 ->217 | 0.13574  |
| 216 ->218 | 0.34976  |

Excited State 6: 2.3369 eV 530.55 nm f=0.0380 <S\*\*2>=0.000

|           |          |
|-----------|----------|
| 214 ->217 | -0.16229 |
| 214 ->218 | 0.59032  |
| 215 ->217 | 0.22383  |
| 215 ->218 | -0.24982 |

Excited State 7: 2.5869 eV 479.28 nm f=0.0273 <S\*\*2>=0.000

|           |          |
|-----------|----------|
| 212 ->217 | -0.21144 |
| 213 ->217 | -0.39546 |
| 213 ->218 | 0.26048  |
| 216 ->217 | 0.12887  |
| 216 ->219 | 0.43483  |

Excited State 8: 2.6062 eV 475.73 nm f=0.0327 <S\*\*2>=0.000  
212 ->217 0.41503  
213 ->217 -0.12460  
213 ->218 -0.36883  
214 ->219 -0.10844  
216 ->219 0.35494

Excited State 9: 2.6637 eV 465.47 nm f=0.1464 <S\*\*2>=0.000  
212 ->217 -0.18624  
212 ->218 -0.13417  
212 ->219 -0.13035  
213 ->217 0.33825  
213 ->218 0.10309  
215 ->219 0.43125  
216 ->219 0.29956

Excited State 10: 2.7059 eV 458.19 nm f=0.4151 <S\*\*2>=0.000  
212 ->217 -0.17532  
213 ->217 -0.36299  
213 ->218 -0.16316  
214 ->219 -0.27015  
215 ->219 0.36986  
216 ->219 -0.25699

Excited State 11: 2.7827 eV 445.55 nm f=0.0315 <S\*\*2>=0.000  
212 ->217 -0.10969  
212 ->218 0.51448  
213 ->217 0.13604  
214 ->219 -0.38283  
215 ->218 0.11524  
215 ->219 -0.13989

Excited State 12: 2.8343 eV 437.45 nm f=0.4226 <S\*\*2>=0.000  
212 ->217 -0.32262  
212 ->218 0.27117  
213 ->218 -0.36584  
214 ->219 0.39567

Excited State 13: 2.8658 eV 432.64 nm f=0.5151 <S\*\*2>=0.000  
212 ->217 0.27221  
212 ->218 0.30346  
213 ->218 0.30275  
214 ->219 0.27102  
215 ->218 0.10791  
215 ->219 0.33686

Excited State 14: 3.0558 eV 405.74 nm f=0.2221 <S\*\*2>=0.000  
213 ->219 0.67013

Excited State 15: 3.1448 eV 394.25 nm f=0.0079 <S\*\*2>=0.000  
207 ->217 0.10789  
207 ->218 -0.12544  
207 ->219 0.26903  
208 ->217 0.22945  
208 ->218 -0.24668  
208 ->219 0.47384

Excited State 16: 3.2927 eV 376.54 nm f=0.0500 <S\*\*2>=0.000  
 208 ->217 0.35956  
 210 ->217 0.13169  
 211 ->217 0.53017  
 212 ->219 -0.14011

Excited State 17: 3.3100 eV 374.57 nm f=0.0022 <S\*\*2>=0.000  
 207 ->217 0.32831  
 208 ->217 0.35249  
 208 ->218 0.14926  
 208 ->219 -0.14030  
 209 ->217 -0.15082  
 210 ->217 0.26630  
 211 ->217 -0.28387  
 211 ->218 0.12103  
 212 ->219 0.13932

Excited State 18: 3.3507 eV 370.02 nm f=0.0199 <S\*\*2>=0.000  
 207 ->217 -0.12967  
 209 ->217 0.56751  
 210 ->217 0.30280  
 211 ->217 -0.17542  
 211 ->218 0.10229  
 212 ->219 -0.12686

Excited State 19: 3.3741 eV 367.46 nm f=0.0349 <S\*\*2>=0.000  
 207 ->217 0.31111  
 208 ->217 0.10035  
 209 ->217 0.36627  
 210 ->217 -0.34376  
 210 ->218 -0.11581  
 211 ->218 -0.17534  
 212 ->219 0.24508

Excited State 20: 3.3854 eV 366.23 nm f=0.0182 <S\*\*2>=0.000  
 207 ->218 -0.10733  
 208 ->217 -0.30153  
 210 ->217 0.25183  
 210 ->218 0.21931  
 211 ->217 0.24802  
 211 ->218 0.16014  
 212 ->219 0.40497

**Table S3. Calculated Singlet Excitation Energies and Oscillator Strengths for T3A**

Excited State 1: 2.1389 eV 579.68 nm f=0.0064 <S\*\*2>=0.000  
 235 -> 240 0.15830  
 236 -> 238 0.46236  
 236 -> 239 0.11327  
 237 -> 238 -0.11592  
 237 -> 239 0.45951

Excited State 2: 2.1455 eV 577.89 nm f=0.0363 <S\*\*2>=0.000

|                                                            |          |
|------------------------------------------------------------|----------|
| 233 -> 239                                                 | -0.15440 |
| 234 -> 238                                                 | -0.15621 |
| 236 -> 238                                                 | 0.11954  |
| 236 -> 239                                                 | -0.44548 |
| 237 -> 238                                                 | 0.46164  |
| 237 -> 239                                                 | 0.12166  |
| Excited State 3: 2.1828 eV 568.01 nm f=0.1117 <S**2>=0.000 |          |
| 235 -> 238                                                 | 0.29250  |
| 236 -> 238                                                 | 0.39465  |
| 236 -> 239                                                 | -0.20574 |
| 237 -> 238                                                 | -0.20821 |
| 237 -> 239                                                 | -0.38731 |
| Excited State 4: 2.1832 eV 567.90 nm f=0.1092 <S**2>=0.000 |          |
| 235 -> 239                                                 | -0.31962 |
| 236 -> 238                                                 | 0.20273  |
| 236 -> 239                                                 | 0.38567  |
| 237 -> 238                                                 | 0.38226  |
| 237 -> 239                                                 | -0.19327 |
| Excited State 5: 2.2085 eV 561.39 nm f=0.0949 <S**2>=0.000 |          |
| 235 -> 238                                                 | -0.37730 |
| 235 -> 239                                                 | 0.45199  |
| 236 -> 238                                                 | 0.15423  |
| 236 -> 240                                                 | -0.19041 |
| 237 -> 239                                                 | -0.18084 |
| 237 -> 240                                                 | 0.12626  |
| Excited State 6: 2.2086 eV 561.36 nm f=0.0970 <S**2>=0.000 |          |
| 235 -> 238                                                 | 0.46328  |
| 235 -> 239                                                 | 0.37617  |
| 236 -> 239                                                 | 0.17892  |
| 236 -> 240                                                 | 0.12811  |
| 237 -> 238                                                 | 0.14493  |
| 237 -> 240                                                 | 0.18865  |
| Excited State 7: 2.4052 eV 515.48 nm f=0.1123 <S**2>=0.000 |          |
| 233 -> 239                                                 | 0.11141  |
| 234 -> 238                                                 | -0.11595 |
| 234 -> 240                                                 | -0.11325 |
| 235 -> 239                                                 | -0.17197 |
| 236 -> 239                                                 | -0.11947 |
| 237 -> 238                                                 | -0.11339 |
| 237 -> 240                                                 | 0.60177  |
| Excited State 8: 2.4055 eV 515.42 nm f=0.1124 <S**2>=0.000 |          |
| 233 -> 238                                                 | -0.11342 |
| 233 -> 240                                                 | 0.11364  |
| 234 -> 239                                                 | -0.11380 |
| 235 -> 238                                                 | -0.18655 |
| 236 -> 238                                                 | 0.10740  |
| 236 -> 240                                                 | 0.60191  |
| 237 -> 239                                                 | -0.11446 |
| Excited State 9: 2.4355 eV 509.08 nm f=0.0188 <S**2>=0.000 |          |

|            |          |
|------------|----------|
| 233 -> 239 | 0.21587  |
| 234 -> 238 | 0.21468  |
| 235 -> 240 | 0.61070  |
| 236 -> 238 | -0.11118 |
| 237 -> 239 | -0.10952 |

Excited State 10: 2.4892 eV 498.08 nm f=0.0275 <S\*\*2>=0.000

|            |          |
|------------|----------|
| 233 -> 238 | -0.22545 |
| 233 -> 239 | 0.37632  |
| 234 -> 238 | 0.37874  |
| 234 -> 239 | 0.22526  |
| 235 -> 240 | -0.26044 |
| 236 -> 239 | -0.11324 |
| 237 -> 238 | 0.11288  |

Excited State 11: 2.6407 eV 469.51 nm f=0.1291 <S\*\*2>=0.000

|            |          |
|------------|----------|
| 233 -> 238 | -0.42654 |
| 233 -> 239 | -0.17994 |
| 234 -> 238 | -0.18449 |
| 234 -> 239 | 0.42778  |
| 235 -> 240 | 0.15955  |
| 236 -> 239 | 0.11775  |
| 237 -> 238 | -0.11790 |

Excited State 12: 2.6650 eV 465.24 nm f=0.6211 <S\*\*2>=0.000

|            |          |
|------------|----------|
| 233 -> 238 | 0.39985  |
| 233 -> 240 | 0.11980  |
| 234 -> 239 | 0.39807  |
| 234 -> 240 | -0.31212 |
| 236 -> 240 | 0.12210  |
| 237 -> 240 | -0.15869 |

Excited State 13: 2.6656 eV 465.12 nm f=0.6219 <S\*\*2>=0.000

|            |          |
|------------|----------|
| 233 -> 239 | 0.40089  |
| 233 -> 240 | 0.31265  |
| 234 -> 238 | -0.39646 |
| 234 -> 240 | 0.12048  |
| 236 -> 240 | -0.15890 |
| 237 -> 240 | -0.12241 |

Excited State 14: 2.8261 eV 438.71 nm f=0.2254 <S\*\*2>=0.000

|            |         |
|------------|---------|
| 233 -> 238 | 0.21409 |
| 233 -> 240 | 0.11418 |
| 234 -> 239 | 0.21402 |
| 234 -> 240 | 0.57992 |
| 236 -> 240 | 0.12014 |
| 237 -> 240 | 0.12176 |

Excited State 15: 2.8265 eV 438.64 nm f=0.2253 <S\*\*2>=0.000

|            |          |
|------------|----------|
| 233 -> 239 | -0.21490 |
| 233 -> 240 | 0.57976  |
| 234 -> 238 | 0.21356  |
| 234 -> 240 | -0.11455 |
| 236 -> 240 | -0.12172 |
| 237 -> 240 | 0.11970  |

Excited State 16: 3.3291 eV 372.42 nm f=0.0972 <S\*\*2>=0.000  
229 -> 238 0.30069  
232 -> 238 0.61211

Excited State 17: 3.3298 eV 372.35 nm f=0.0969 <S\*\*2>=0.000  
229 -> 239 0.30063  
232 -> 239 0.61561

Excited State 18: 3.3678 eV 368.15 nm f=0.0009 <S\*\*2>=0.000  
230 -> 238 0.49840  
231 -> 239 0.49022

Excited State 19: 3.3734 eV 367.53 nm f=0.0009 <S\*\*2>=0.000  
230 -> 238 0.39805  
230 -> 239 -0.24217  
230 -> 240 0.14522  
231 -> 238 -0.31364  
231 -> 239 -0.38572

Excited State 20: 3.3737 eV 367.50 nm f=0.0006 <S\*\*2>=0.000  
230 -> 238 0.26317  
230 -> 239 0.32133  
231 -> 238 0.44878  
231 -> 239 -0.29847  
231 -> 240 -0.14461
